# Supplementary material
Source: PubMed Central journal article supplement (PMC5714782)
Supplement: ajtr0009-4984-f6.pdf [file ajtr0009-4984-f6.pdf]

MiR-106a promotes tumor growth, migration, and invasion by targeting *BCL2L11* in EC

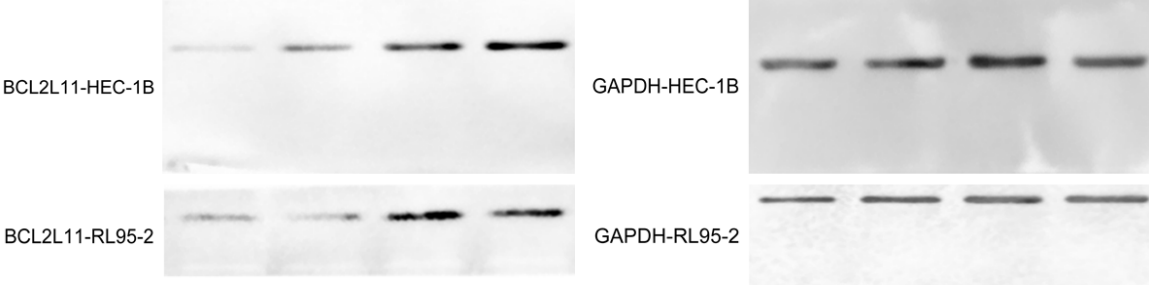

Supplementary Figure 1. Western blot.
